# Supplementary material for: Diagnosing Alzheimer’s disease: are we any nearer to useful biomarker-based, non-invasive tests?
Source: PubMed Central journal article supplement — GMS Health Technol Assess. 2013 Apr 11;9:Doc01. doi: 10.3205/hta000107 (PMC3677379; doi:10.3205/hta000107), 2013-04-11
Supplement: HTA-09-01-s-001.pdf [file HTA-09-01-s-001.pdf]

## A checklist for HTA related documents

This summary form is intended as an aid for those who wish to make a record of the extent to which a health technology assessment report meets the 14 questions given in the checklist.

It is **NOT** intended as a scorecard to rate the standard of HTA documents — reports may be valid and useful without meeting all the criteria that have been listed.

| Item                                                                                                                                              | Yes                                                                             | Partly                              | No                                                                                |                                                                    |                                     |    |
|---------------------------------------------------------------------------------------------------------------------------------------------------|---------------------------------------------------------------------------------|-------------------------------------|-----------------------------------------------------------------------------------|--------------------------------------------------------------------|-------------------------------------|----|
| <b>Preliminary</b>                                                                                                                                |                                                                                 |                                     |                                                                                   |                                                                    |                                     |    |
| 1. Appropriate contact details for further information?                                                                                           | X                                                                               |                                     |                                                                                   |                                                                    |                                     |    |
| 2. Authors identified?                                                                                                                            | X                                                                               |                                     |                                                                                   |                                                                    |                                     |    |
| 3. Statement regarding conflict of interest?                                                                                                      | X                                                                               |                                     |                                                                                   |                                                                    |                                     |    |
| 4. Statement on whether report externally reviewed?                                                                                               | X                                                                               |                                     |                                                                                   |                                                                    |                                     |    |
| 5. Short summary in non-technical language?                                                                                                       | X                                                                               |                                     |                                                                                   |                                                                    |                                     |    |
| <b>Why?</b>                                                                                                                                       |                                                                                 |                                     |                                                                                   |                                                                    |                                     |    |
| 6. Reference to the policy question that is addressed?                                                                                            | X                                                                               |                                     |                                                                                   |                                                                    |                                     |    |
| 7. Reference to the research question(s) that is/are addressed?                                                                                   | X                                                                               |                                     |                                                                                   |                                                                    |                                     |    |
| 8. Scope of the assessment specified?                                                                                                             | X                                                                               |                                     |                                                                                   |                                                                    |                                     |    |
| 9. Description of the assessed health technology?                                                                                                 | X                                                                               |                                     |                                                                                   |                                                                    |                                     |    |
| <b>How?</b>                                                                                                                                       |                                                                                 |                                     |                                                                                   |                                                                    |                                     |    |
| 10. Details on sources of information and literature search strategies provided?<br>(In the document or within the published referenced document) |                                                                                 |                                     |                                                                                   |                                                                    |                                     |    |
| Search strategy                                                                                                                                   | Databases                                                                       | Year range                          | Language restriction                                                              | Primary data                                                       | Other kind of information resources |    |
| X                                                                                                                                                 | X                                                                               | X                                   | O                                                                                 | O                                                                  | X                                   |    |
|                                                                                                                                                   |                                                                                 |                                     |                                                                                   |                                                                    |                                     |    |
| Complete reference list of included studies                                                                                                       | List of excluded studies                                                        | Inclusion criteria                  | Exclusion criteria                                                                |                                                                    |                                     |    |
| O                                                                                                                                                 | O                                                                               | X                                   | X                                                                                 |                                                                    |                                     |    |
| 11. Information on basis for the assessment and interpretation of selected data and information?                                                  |                                                                                 |                                     |                                                                                   |                                                                    |                                     |    |
| Method of data extraction described?                                                                                                              | Critical appraisal method (for quality assessment of the literature) described? | Method of data synthesis described? | Results of the assessment clearly presented, e.g. in the form of evidence tables? |                                                                    |                                     |    |
| O                                                                                                                                                 | X                                                                               | O                                   | O                                                                                 |                                                                    |                                     |    |
| <b>Context?</b> (may or may not apply to each HTA)                                                                                                |                                                                                 |                                     |                                                                                   |                                                                    |                                     |    |
| (Medico-) legal implications considered?                                                                                                          | Economic analysis provided?                                                     | Ethical implications considered?    | Social implications considered?                                                   | Other perspectives (stakeholders, patients, consumers) considered? |                                     |    |
| X                                                                                                                                                 | X                                                                               | O                                   | O                                                                                 | O                                                                  |                                     |    |
| <b>What then?</b>                                                                                                                                 |                                                                                 |                                     |                                                                                   | Yes                                                                | Partly                              | No |
| 12. Findings of the assessment discussed?                                                                                                         |                                                                                 |                                     |                                                                                   | X                                                                  |                                     |    |
| 13. Conclusions from assessment clearly stated?                                                                                                   |                                                                                 |                                     |                                                                                   | X                                                                  |                                     |    |
| 14. Suggestions for further action?                                                                                                               |                                                                                 |                                     |                                                                                   | X                                                                  |                                     |    |
